# Supplementary material for: Facile synthesis of magnetic Fe3O4/CeCO3OH composites with excellent adsorption capability for small cationic dyes
Source: Royal Society of Chemistry journal article supplement (doi:10.1039/c5ra19076b), 2015-01-01
Supplement: c5ra19076b1.pdf [file c5ra19076b1.pdf]

## *Supporting information*

### **Facile Synthesis of Magnetic Fe<sub>3</sub>O<sub>4</sub>/CeCO<sub>3</sub>OH Composites with Excellent Adsorption Capability for Small Cationic Dyes**

Keyan Li, Fanfan Chai, Yongqin Zhao and Xinwen Guo\*

*State Key Laboratory of Fine Chemicals, PSU-DUT Joint Center for Energy Research,  
School of Chemical Engineering, Dalian University of Technology, Dalian 116024,  
PR China. \*Corresponding author, E-mail: guoxw@dlut.edu.cn.*

#### ***Adsorption kinetics***

The kinetics of Fe<sub>4</sub>Ce<sub>1</sub> was analyzed using two commonly used kinetic models, namely, the pseudo-first-order<sup>1</sup> and pseudo-second-order kinetic models<sup>2</sup>, which can be expressed as equations (1) and (2), respectively:

$$\ln(q_e - q_t) = \ln q_e - k_1 t \quad (1)$$

$$\frac{t}{q_t} = \frac{1}{k_2 q_e^2} + \frac{t}{q_e} \quad (2)$$

where  $q_t$  (mg g<sup>-1</sup>) is the adsorption uptake at time  $t$  (min);  $q_e$  (mg g<sup>-1</sup>) is the adsorption capacity at adsorption equilibrium; and  $k_1$  (min<sup>-1</sup>) and  $k_2$  (g mg<sup>-1</sup> min<sup>-1</sup>) are the kinetic rate constants for the pseudo-first-order and the pseudo-second-order models, respectively. The adsorption kinetic data were fitted to the above two models by linear fitting of  $\ln(q_e - q_t)$  versus  $t$  and  $(t/q_t)$  versus  $t$ , respectively. The fitting plots are shown in Fig. S1 and the calculated kinetic parameters are listed in Table S1. The results (the correlation coefficients  $R^2$  listed in Table S1) clearly indicate that the adsorption

kinetics closely follows the pseudo-second-order kinetic model rather than the pseudo-first-order kinetic model. Compared to the pseudo-first-order model, the calculated  $q_e$  based on the pseudo-second-order model is consistent well with the experimental  $q_e$ , which supports our conclusion that the kinetic data are followed by the pseudo-second-order model.

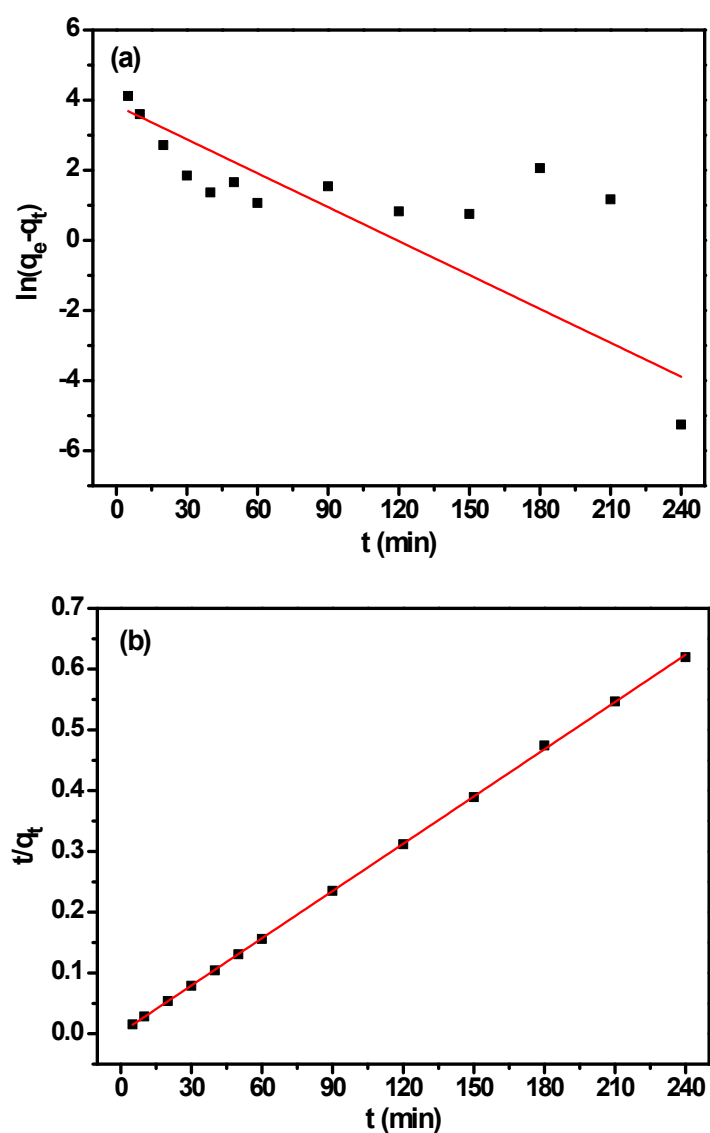

Fig. S1 Plots of pseudo-first-order (a) and pseudo-second-order (b) kinetics for the adsorption of MB on Fe4Ce1.

Table S1 Kinetic parameters for the adsorption of MB on Fe4Ce1.

| Pseudo-first-order model   |                             |        | Pseudo-second-order model                     |                             |        |
|----------------------------|-----------------------------|--------|-----------------------------------------------|-----------------------------|--------|
| $k_1$ (min <sup>-1</sup> ) | $q_e$ (mg g <sup>-1</sup> ) | $R^2$  | $k_2$ (g mg <sup>-1</sup> min <sup>-1</sup> ) | $q_e$ (mg g <sup>-1</sup> ) | $R^2$  |
| 0.0322                     | 46.9                        | 0.3949 | 0.0039                                        | 386.1                       | 0.9999 |

### Adsorption isotherms

The Langmuir<sup>3</sup> and Freundlich<sup>4</sup> isotherm models were used to analyze the equilibrium adsorption data, and their linear forms can be expressed as equations (3) and (4), respectively:

$$\frac{C_e}{q_e} = \frac{1}{K_l q_{\max}} + \frac{C_e}{q_{\max}} \quad (3)$$

$$\ln q_e = \ln K_f + \frac{1}{n} \ln C_e \quad (4)$$

where  $C_e$  (mg L<sup>-1</sup>) is the equilibrium concentration of MB;  $q_e$  (mg g<sup>-1</sup>) is the amount of MB adsorbed per unit mass of adsorbent;  $q_{\max}$  (mg g<sup>-1</sup>) represents the maximum adsorption capacity of MB per unit mass of adsorbent;  $K_l$  (L mg<sup>-1</sup>) is the Langmuir constant related to the energy of adsorption,  $K_f$  is the Freundlich constant related to the adsorption capacity (mg<sup>1-1/n</sup> L<sup>1/n</sup>/g), and  $n$  is a dimensionless parameter related to the adsorption intensity. The adsorption isotherms of MB on Fe4Ce1 fitted with the linearized Langmuir and Freundlich models are shown in Fig. S2, and the fitting parameters on the basis of experimental data for MB adsorption isotherms are listed in Table S2. For the adsorption of MB on Fe4Ce1, the Langmuir model fits better with the adsorption data than the Freundlich model. On the basis of the Langmuir equation,

the value of  $q_{max}$  was calculated to be 671.1 mg g<sup>-1</sup> for MB adsorption, consistent well with the experimental value of 666.2 mg g<sup>-1</sup>.

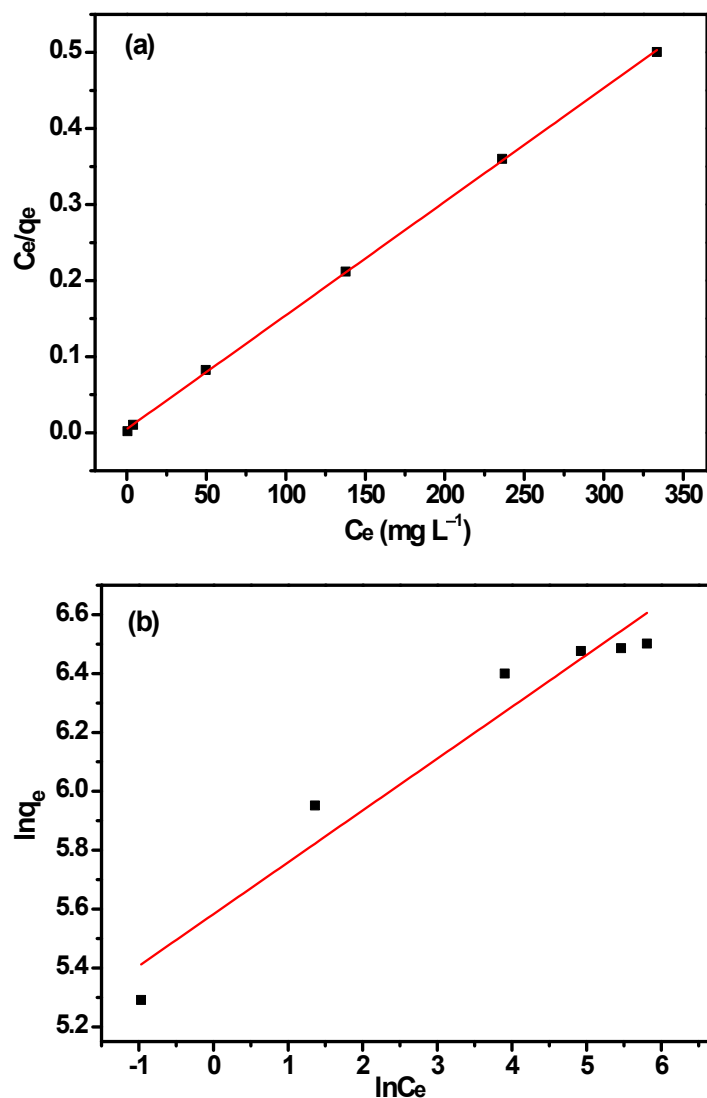

Fig. S2 Langmuir plot (a) and Freundlich plot (b) of isotherms for the adsorption of MB on Fe4Ce1.

Table S2 Adsorption isotherm constants for the adsorption of MB on Fe4Ce1.

| Langmuir constants              |                             |       | Freundlich constants                            |     |       |
|---------------------------------|-----------------------------|-------|-------------------------------------------------|-----|-------|
| $q_{max}$ (mg g <sup>-1</sup> ) | $K_l$ (L mg <sup>-1</sup> ) | $R^2$ | $K_f$ (mg <sup>1-1/n</sup> L <sup>1/n</sup> /g) | $n$ | $R^2$ |

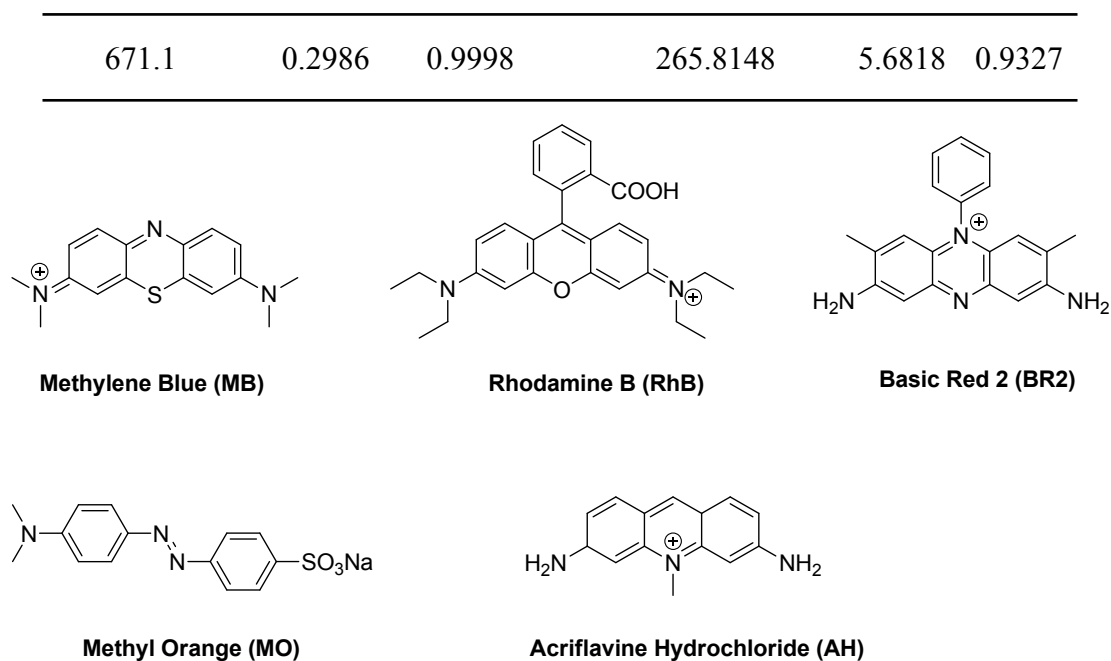

Fig. S3 Molecular structure of dyes used in the experiments.

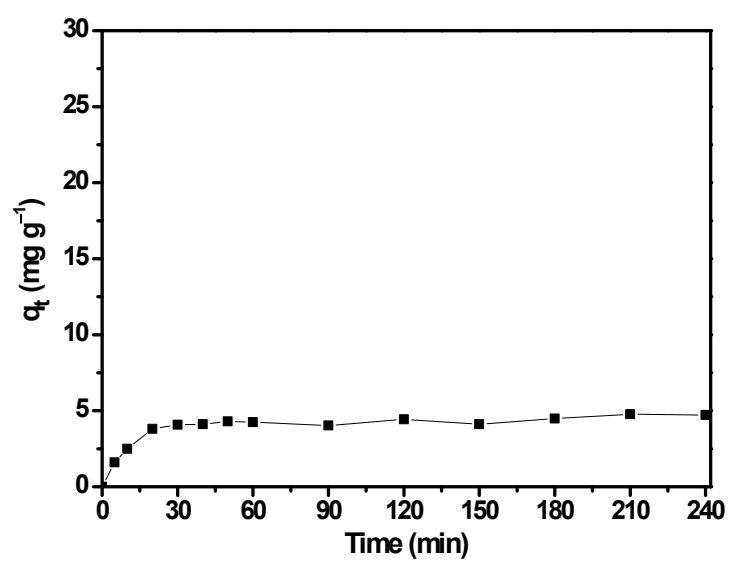

Fig. S4 Adsorption amount of Fe4Ce1 prepared without addition of PAAS versus contact time for MB.

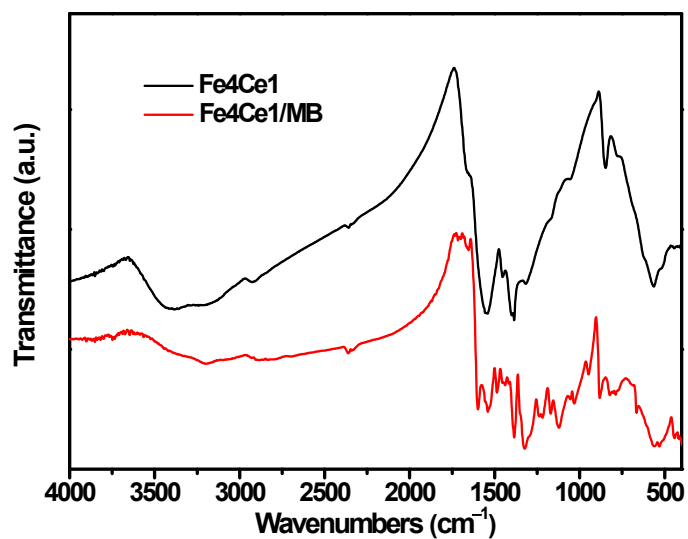

Fig. S5 FTIR spectra of Fe4Ce1 before and after MB adsorption.

Table S3 Weight losses of Fe5Ce0, Fe4Ce1, Fe1Ce1, Fe1Ce4 and Fe0Ce5 at different stages.

| Adsorbent | 25–200 °C<br>(%) | 200–550 °C<br>(%) | CeCO <sub>3</sub> OH*<br>(%) | Carboxylic groups<br>(%) |
|-----------|------------------|-------------------|------------------------------|--------------------------|
| Fe5Ce0    | 2.6              | 7.6               | 0                            | 7.6                      |
| Fe4Ce1    | 12.3             | 24.5              | 6.2                          | 18.3                     |
| Fe1Ce1    | 9.5              | 26.1              | 11.0                         | 15.1                     |
| Fe1Ce4    | 7.7              | 25.4              | 13.4                         | 12.0                     |
| Fe0Ce5    | 5.2              | 20.6              | 14.7                         | 5.9                      |

\*The weight loss of CeCO<sub>3</sub>OH decomposition for Fe4Ce1, Fe1Ce1 and Fe1Ce4 was calculated by multiplying the weight loss of CeCO<sub>3</sub>OH decomposition for Fe0Ce5 (14.7 %) by the weight percentage of CeCO<sub>3</sub>OH in the Fe-Ce composites. The weight percentages of CeCO<sub>3</sub>OH in Fe4Ce1, Fe1Ce1 and Fe1Ce4 are 41.9 %, 75.1 % and 91.2 %, respectively.

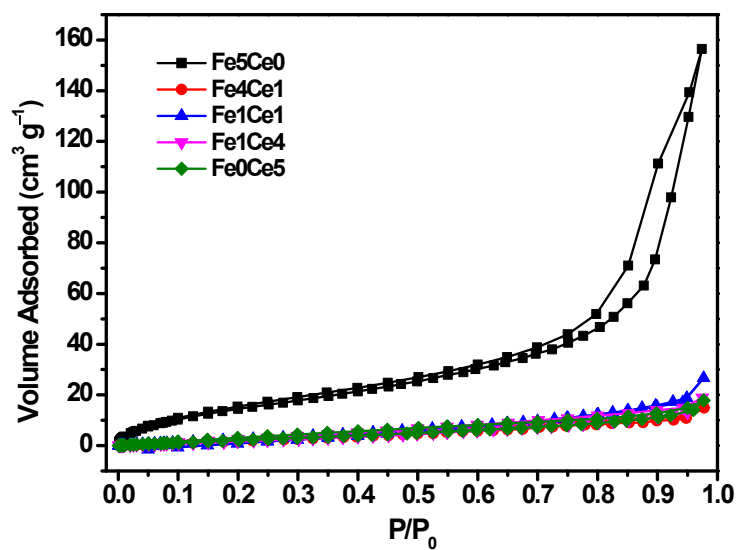

Fig. S6 Ar adsorption/desorption isotherms of Fe5Ce0, Fe4Ce1, Fe1Ce1, Fe1Ce4 and Fe0Ce5.

Table S4 BET surface areas of the samples.

| Samples                                         | Fe5Ce0 | Fe4Ce1 | Fe1Ce1 | Fe1Ce4 | Fe0Ce5 |
|-------------------------------------------------|--------|--------|--------|--------|--------|
| $S_{\text{BET}}$ ( $\text{m}^2 \text{g}^{-1}$ ) | 54.0   | 12.4   | 14.8   | 16.2   | 13.3   |

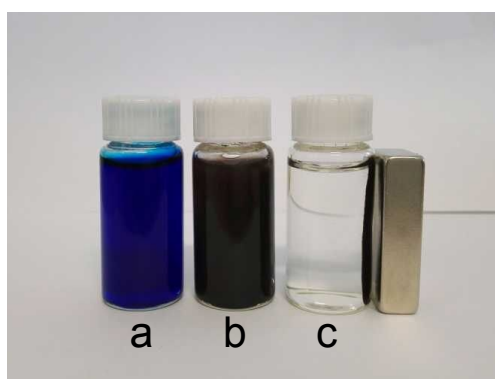

Fig. S7 Photographs for MB solution before (a), after adsorption by adding Fe4Ce1 (b) and after being separated using an outer magnet (c).

## ***References***

- (1) S. Lagergren, *K. Sven. Vetenskapsakad. Handl.*, 1898, 24, 1.
- (2) K. Periasamy, K. Srinivasan and P. R. Muruganan, *J. Environ. Health*, 1991, 33, 433.
- (3) I. Langmuir, *J. Am. Chem. Soc.*, 1918, 40, 1361.
- (4) H. M. F. Freundlich, *Z. Phys. Chem.*, 1906, 57, 385.
